# Supplementary material
Source: HighWire-hosted journal article supplement (https://erj.ersjournals.com/content/58/1/2003432)
Supplement: inline-supplementary-material-1 [file inline-supplementary-material-1.pdf]

Table S1 – Pearson correlation coefficients between any pair of personal exposure to air pollutants based on 14,740 person-days of follow-up. All exposures are expressed as 24-hour means, except for O<sub>3</sub> which is 8-hour maximum.

|                         | <b>PM<sub>2.5</sub></b> | <b>PM<sub>10</sub></b> | <b>NO<sub>2</sub></b> | <b>NO</b> | <b>CO</b> | <b>O<sub>3</sub></b> |
|-------------------------|-------------------------|------------------------|-----------------------|-----------|-----------|----------------------|
| <b>PM<sub>2.5</sub></b> | 1                       |                        |                       |           |           |                      |
| <b>PM<sub>10</sub></b>  | 0.816                   | 1                      |                       |           |           |                      |
| <b>NO<sub>2</sub></b>   | 0.110                   | 0.118                  | 1                     |           |           |                      |
| <b>NO</b>               | 0.235                   | 0.152                  | 0.212                 | 1         |           |                      |
| <b>CO</b>               | 0.213                   | 0.165                  | 0.241                 | 0.399     | 1         |                      |
| <b>O<sub>3</sub></b>    | -0.086                  | -0.031                 | 0.067                 | -0.145    | -0.157    | 1                    |

All results are statistically significant at significance level of <0.001.

Table S2 - Descriptive statistics for personal exposure to air pollution, expressed as 24-hour averages, except for O<sub>3</sub> which is 8-hour maximum by season. N: number of valid measurements.

| Personal Exposure                          | Season | N     | Mean | SD   | 25 <sup>th</sup> %ile | Median | 75 <sup>th</sup> %ile |
|--------------------------------------------|--------|-------|------|------|-----------------------|--------|-----------------------|
| <b>PM<sub>2.5</sub> (µg/m<sup>3</sup>)</b> | Spring | 4,223 | 15.0 | 13.4 | 7.6                   | 11.5   | 17.6                  |
|                                            | Summer | 4,152 | 10.4 | 10.3 | 5.6                   | 8.1    | 11.9                  |
|                                            | Autumn | 2,517 | 17.7 | 20.7 | 8.8                   | 13.3   | 19.4                  |
|                                            | Winter | 2,765 | 23.5 | 25.8 | 11.1                  | 17.0   | 26.8                  |
| <b>PM<sub>10</sub> (µg/m<sup>3</sup>)</b>  | Spring | 4,200 | 16.9 | 21.3 | 6.1                   | 11.5   | 18.5                  |
|                                            | Summer | 4,103 | 11.2 | 14.0 | 4.3                   | 8.6    | 13.5                  |
|                                            | Autumn | 2,517 | 18.4 | 20.5 | 10.1                  | 14.2   | 20.2                  |
|                                            | Winter | 2,765 | 23.6 | 25.1 | 11.3                  | 17.3   | 26.9                  |
| <b>NO<sub>2</sub> (ppb)</b>                | Spring | 4,495 | 14.6 | 6.7  | 10.5                  | 13.0   | 16.3                  |
|                                            | Summer | 4,506 | 11.7 | 3.4  | 9.4                   | 10.7   | 13.0                  |
|                                            | Autumn | 2,769 | 13.8 | 5.5  | 10.6                  | 12.6   | 15.3                  |
|                                            | Winter | 2,969 | 15.8 | 8.5  | 11.2                  | 13.7   | 17.3                  |
| <b>NO (ppb)</b>                            | Spring | 4,456 | 6.1  | 4.8  | 3.0                   | 4.7    | 7.3                   |
|                                            | Summer | 4,463 | 4.5  | 5.2  | 2.3                   | 3.5    | 5.2                   |
|                                            | Autumn | 2,753 | 12.6 | 13.1 | 4.6                   | 8.6    | 16.2                  |
|                                            | Winter | 2,957 | 16.9 | 17.0 | 6.0                   | 11.5   | 21.4                  |
| <b>O<sub>3</sub> (ppb)</b>                 | Spring | 4,495 | 6.6  | 5.4  | 3.7                   | 5.4    | 8.3                   |
|                                            | Summer | 4,506 | 8.5  | 6.0  | 4.7                   | 7.0    | 10.6                  |
|                                            | Autumn | 2,769 | 5.0  | 4.1  | 2.5                   | 4.0    | 6.1                   |
|                                            | Winter | 2,969 | 4.5  | 3.4  | 2.2                   | 3.4    | 5.7                   |
| <b>CO (ppm)</b>                            | Spring | 4,425 | 0.19 | 0.09 | 0.15                  | 0.17   | 0.21                  |
|                                            | Summer | 4,429 | 0.18 | 0.07 | 0.14                  | 0.16   | 0.19                  |
|                                            | Autumn | 2,724 | 0.23 | 0.09 | 0.17                  | 0.21   | 0.26                  |
|                                            | Winter | 2,944 | 0.25 | 0.14 | 0.18                  | 0.23   | 0.30                  |

Table S3 - Descriptive statistics for ambient measurements of air pollution as measured from the nearest monitor of the London Air Quality Network (LAQN), expressed as 24-hour averages, except for O<sub>3</sub> which is 8-hour maximum. N obs: number of valid observations.

| Exposure                               | N obs  | Mean | SD   | 25 <sup>th</sup> %ile | Median | 75 <sup>th</sup> %ile |
|----------------------------------------|--------|------|------|-----------------------|--------|-----------------------|
| PM <sub>2.5</sub> (µg/m <sup>3</sup> ) | 13,646 | 12.4 | 10.4 | 6.3                   | 8.7    | 14.3                  |
| PM <sub>10</sub> (µg/m <sup>3</sup> )  | 13,596 | 19.1 | 11.1 | 12.0                  | 15.4   | 22.7                  |
| NO <sub>2</sub> (ppb)                  | 14,739 | 17.2 | 9.3  | 10.6                  | 15.6   | 21.5                  |
| NO (ppb)                               | 14,630 | 11.0 | 26.6 | 1.7                   | 3.1    | 7.3                   |
| O <sub>3</sub> (ppb)                   | 14,647 | 29.4 | 12.3 | 22.1                  | 0.16   | 0.21                  |
| CO (ppm)                               | 14,289 | 0.20 | 0.14 | 0.13                  | 30.3   | 37.0                  |

The measurements are from the nearest monitor of the London Air Quality Network (<http://www.londonair.org.uk/LondonAir/Default.aspx>).

Table S4 - Associations between personal exposure to air pollutants and exacerbation in main and sensitivity analyses. In bold are the statistically significant estimates.

|                   | OR for exacerbation with 95% CI per interquartile range increase (except otherwise stated) |                                                   |                                       |                                       |                                       |                                       |                                       |                                       |
|-------------------|--------------------------------------------------------------------------------------------|---------------------------------------------------|---------------------------------------|---------------------------------------|---------------------------------------|---------------------------------------|---------------------------------------|---------------------------------------|
|                   | Core <sup>a</sup>                                                                          | Full <sup>b</sup>                                 |                                       | Lag1<br>Full                          | Lag2<br>Full                          | Lag3<br>Full                          | Lag03<br>Full                         | Took<br>monitor <sup>c</sup>          |
|                   |                                                                                            | per unit<br>change                                | per IQR<br>change                     |                                       |                                       |                                       |                                       |                                       |
| PM <sub>2.5</sub> | 0.998<br>(0.967, 1.029)                                                                    | 0.998<br>(0.995, 1.001)                           | 0.983<br>(0.953, 1.014)               | 0.990<br>(0.959, 1.022)               | 1.001<br>(0.969, 1.034)               | 1.016<br>(0.982, 1.051)               | 1.001<br>(0.952, 1.054)               | 0.978<br>(0.944, 1.014)               |
| PM <sub>10</sub>  | 1.008<br>(0.973, 1.044)                                                                    | 0.999<br>(0.996, 1.002)                           | 0.992<br>(0.957, 1.028)               | 1.002<br>(0.965, 1.040)               | 1.018<br>(0.980, 1.057)               | 1.036<br>(0.997, 1.076)               | 1.032<br>(0.977, 1.090)               | 0.983<br>(0.943, 1.025)               |
| NO <sub>2</sub>   | <b>1.227</b><br><b>(1.149, 1.311)</b>                                                      | <b>1.029</b><br><b>(1.016, 1.043)</b>             | <b>1.164</b><br><b>(1.086, 1.246)</b> | <b>1.175</b><br><b>(1.096, 1.259)</b> | <b>1.201</b><br><b>(1.120, 1.288)</b> | <b>1.192</b><br><b>(1.111, 1.279)</b> | <b>1.319</b><br><b>(1.206, 1.444)</b> | <b>1.156</b><br><b>(1.071, 1.248)</b> |
| NO                | <b>1.119</b><br><b>(1.079, 1.161)</b>                                                      | <b>1.013</b><br><b>(1.007, 1.018)</b>             | <b>1.094</b><br><b>(1.054, 1.136)</b> | <b>1.089</b><br><b>(1.048, 1.132)</b> | <b>1.077</b><br><b>(1.036, 1.120)</b> | <b>1.057</b><br><b>(1.017, 1.099)</b> | <b>1.150</b><br><b>(1.093, 1.210)</b> | <b>1.076</b><br><b>(1.032, 1.122)</b> |
| CO                | 1.014<br>(0.966, 1.046)                                                                    | <b>1.009</b><br><b>(1.003, 1.014)<sup>d</sup></b> | <b>1.076</b><br><b>(1.030, 1.124)</b> | <b>1.091</b><br><b>(1.040, 1.145)</b> | <b>1.090</b><br><b>(1.040, 1.142)</b> | <b>1.068</b><br><b>(1.021, 1.117)</b> | <b>1.110</b><br><b>(1.055, 1.169)</b> | <b>1.061</b><br><b>(1.009, 1.117)</b> |
| O <sub>3</sub>    | <b>0.918</b><br><b>(0.861, 0.979)</b>                                                      | 1.003<br>(0.990, 1.017)                           | 1.017<br>(0.950, 1.089)               | 0.970<br>(0.900, 1.045)               | 0.953<br>(0.885, 1.026)               | 0.933<br>(0.866, 1.005)               | 0.956<br>(0.878, 1.041)               | 1.032<br>(0.957, 1.112)               |

<sup>a</sup>Includes: age, sex, COPD severity and each pollutant's same day (Lag0) personal measurement.

<sup>b</sup>Core model plus IMD rank, ICS medication use, temperature and time.

<sup>c</sup>Excluding those person-days that participants left their house and forgot to take the portable monitor.

<sup>d</sup>Per 0.01 ppm increase.

Figure S1 - Estimated change in PEF (L/min) associated with an IQR increase on the same (Lag0) or previous (Lag1, Lag2, Lag3) days or the average of the same and three previous days (Lag03) for personal exposure to each pollutant. Random intercept models adjusted for age, sex, COPD severity, IMD rank, ICS medication use, temperature and time.

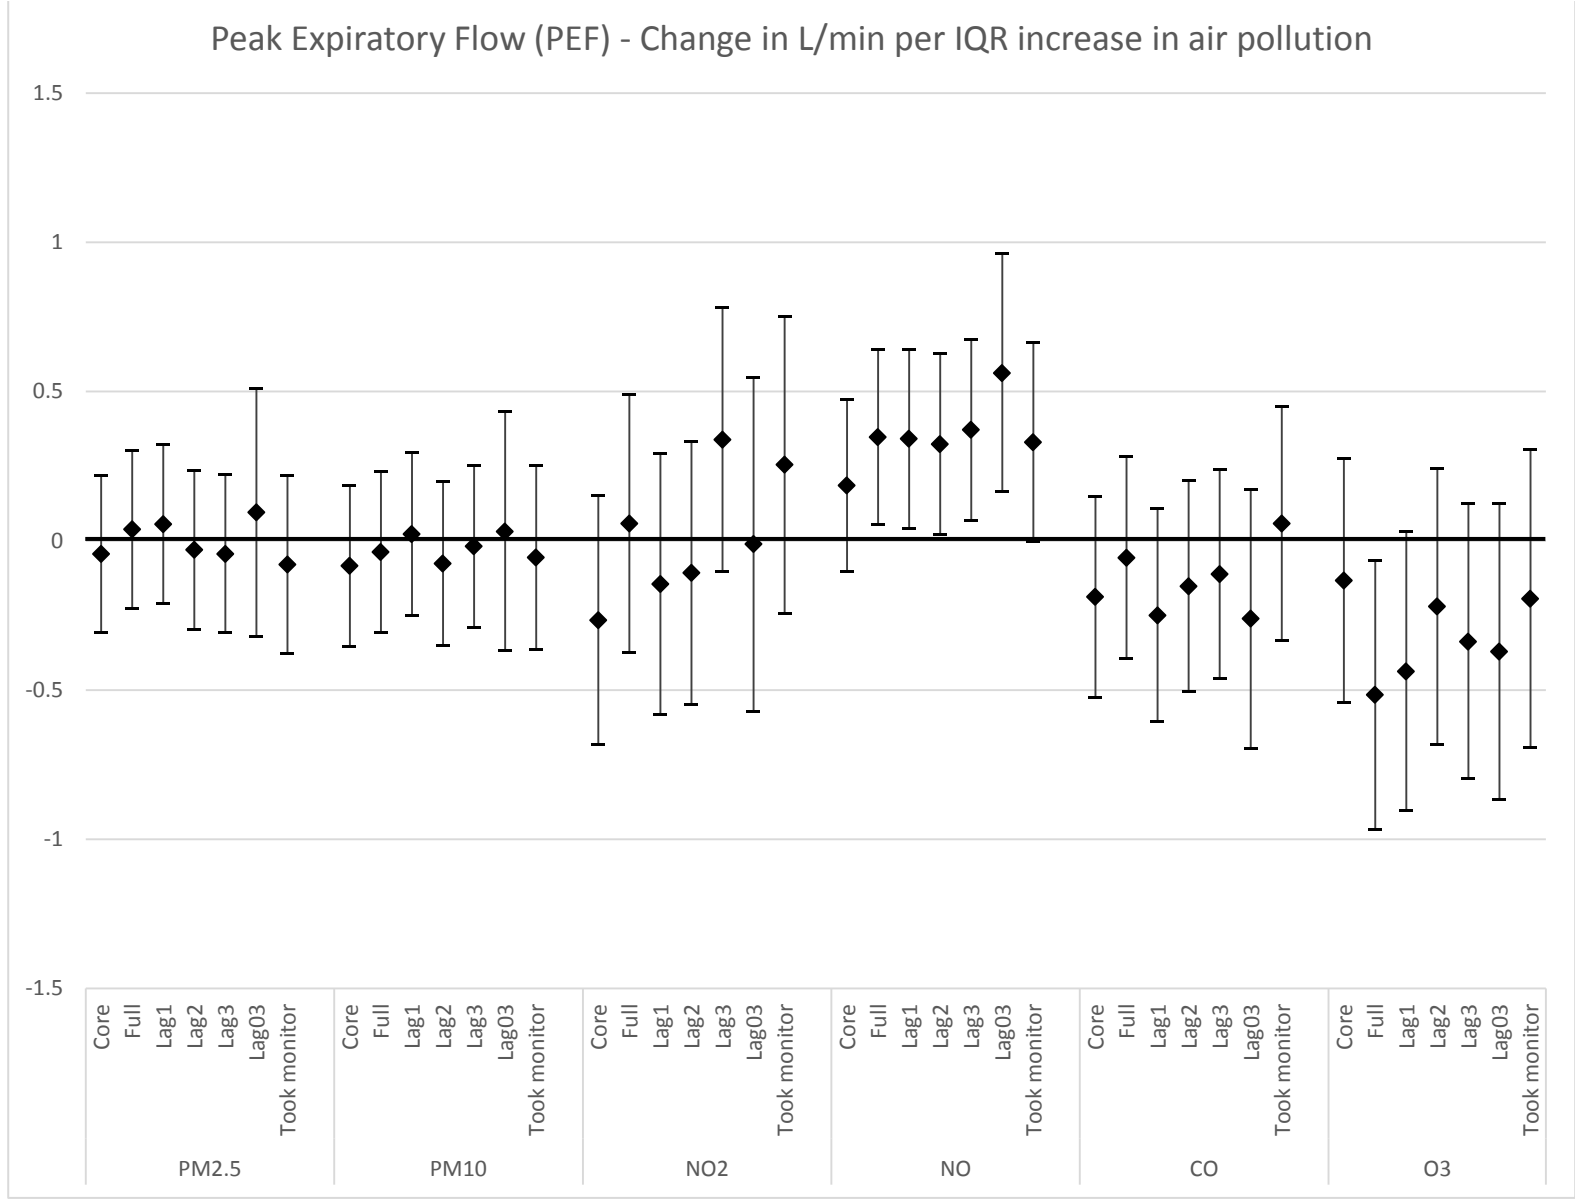

Table S5 - Associations between personal exposure to air pollutants and various respiratory symptoms. In bold are the statistically significant estimates.

|                         | OR for respiratory symptoms with 95% CI <sup>a</sup> |                                |                                             |                                |                                      |                         |                                             |                                |                                      |                                |
|-------------------------|------------------------------------------------------|--------------------------------|---------------------------------------------|--------------------------------|--------------------------------------|-------------------------|---------------------------------------------|--------------------------------|--------------------------------------|--------------------------------|
|                         | Breathlessness                                       |                                | Cough                                       |                                | Sleep disturbance                    |                         | Sputum                                      |                                | Wheeze                               |                                |
|                         | per unit change                                      | per IQR change                 | per unit change                             | per IQR change                 | per unit change                      | per IQR change          | per unit change                             | per IQR change                 | per unit change                      | per IQR change                 |
| <b>PM<sub>2.5</sub></b> | <b>0.996</b><br>(0.992, 0.999)                       | <b>0.953</b><br>(0.919, 0.989) | <b>0.996</b><br>(0.993, 1.000)              | <b>0.963</b><br>(0.929, 0.998) | 0.998<br>(0.994, 1.001)              | 0.974<br>(0.935, 1.014) | 1.000<br>(0.996, 1.004)                     | 0.997<br>(0.955, 1.042)        | <b>0.994</b><br>(0.989, 0.999)       | <b>0.935</b><br>(0.883, 0.990) |
| <b>PM<sub>10</sub></b>  | <b>0.997</b><br>(0.994, 0.999)                       | <b>0.959</b><br>(0.926, 0.994) | <b>0.995</b><br>(0.992, 0.998)              | <b>0.939</b><br>(0.903, 0.976) | 0.997<br>(0.994, 1.001)              | 0.968<br>(0.932, 1.006) | 0.999<br>(0.995, 1.003)                     | 0.988<br>(0.944, 1.033)        | 0.996<br>(0.992, 1.000)              | 0.957<br>(0.911, 1.005)        |
| <b>NO<sub>2</sub></b>   | 1.010<br>(0.998, 1.022)                              | 1.053<br>(0.988, 1.122)        | <b>1.030</b><br>(1.016, 1.044)              | <b>1.167</b><br>(1.088, 1.251) | 0.998<br>(0.983, 1.013)              | 0.989<br>(0.914, 1.069) | 1.014<br>(0.999, 1.029)                     | 1.073<br>(0.992, 1.161)        | 1.006<br>(0.985, 1.027)              | 1.030<br>(0.922, 1.152)        |
| <b>NO</b>               | <b>1.008</b><br>(1.003, 1.014)                       | <b>1.060</b><br>(1.019, 1.102) | <b>1.013</b><br>(1.007, 1.018)              | <b>1.094</b><br>(1.052, 1.139) | 0.995<br>(0.988, 1.003)              | 0.967<br>(0.914, 1.022) | <b>1.008</b><br>(1.002, 1.015)              | <b>1.060</b><br>(1.012, 1.112) | 1.001<br>(0.993, 1.010)              | 1.010<br>(0.952, 1.072)        |
| <b>CO</b>               | 1.004<br>(0.999, 1.010) <sup>b</sup>                 | 1.038<br>(0.988, 1.091)        | <b>1.008</b><br>(1.002, 1.014) <sup>b</sup> | <b>1.071</b><br>(1.019, 1.125) | 0.994<br>(0.986, 1.001) <sup>b</sup> | 0.948<br>(0.890, 1.010) | <b>1.011</b><br>(1.004, 1.017) <sup>b</sup> | <b>1.094</b><br>(1.035, 1.115) | 1.007<br>(0.998, 1.016) <sup>b</sup> | 1.060<br>(0.982, 1.144)        |
| <b>O<sub>3</sub></b>    | <b>1.013</b><br>(1.000, 1.025)                       | <b>1.065</b><br>(1.000, 1.135) | 0.993<br>(0.980, 1.007)                     | 0.967<br>(0.904, 1.033)        | 1.010<br>(0.996, 1.024)              | 1.050<br>(0.979, 1.126) | 0.989<br>(0.971, 1.007)                     | 0.944<br>(0.862, 1.034)        | 1.008<br>(0.994, 1.022)              | 1.042<br>(0.972, 1.116)        |

<sup>a</sup>Models adjusted for age, sex, COPD severity, IMD rank, ICS medication use, temperature and time.

<sup>b</sup>Per 0.01 ppm increase.

Table S6 –Associations between personal exposure to air pollutants and peak expiratory flow and exacerbation by COPD severity. In bold are the statistically significant interaction term at the 0.05 level.

|                         | Estimated change in PEF (L/min) or OR for exacerbation with 95% CI by COPD severity per unit increase <sup>a</sup> |                                                   |                                                   |                                                   |
|-------------------------|--------------------------------------------------------------------------------------------------------------------|---------------------------------------------------|---------------------------------------------------|---------------------------------------------------|
|                         | PEF                                                                                                                |                                                   | Exacerbation                                      |                                                   |
|                         | Mild or Moderate COPD                                                                                              | Severe or Very severe COPD                        | Mild or Moderate COPD                             | Severe or Very severe COPD                        |
| <b>PM<sub>2.5</sub></b> | 0.006<br>(-0.022, 0.034)                                                                                           | -0.004<br>(-0.054, 0.046)                         | 0.998<br>(0.995, 1.001)                           | 1.000<br>(0.994, 1.006)                           |
| <b>PM<sub>10</sub></b>  | -0.002<br>(-0.028, 0.024)                                                                                          | -0.007<br>(-0.051, 0.037)                         | 0.998<br>(0.995, 1.002)                           | 1.002<br>(0.996, 1.008)                           |
| <b>NO<sub>2</sub></b>   | <b>-0.090</b><br><b>(-0.189, 0.010)</b>                                                                            | <b>0.229</b><br><b>(0.084, 0.374)</b>             | 1.037<br>(1.019, 1.055)                           | 1.020<br>(1.001, 1.040)                           |
| <b>NO</b>               | 0.029<br>(-0.019, 0.076)                                                                                           | 0.099<br>(0.023, 0.175)                           | <b>1.025</b><br><b>(1.018, 1.032)</b>             | <b>0.990</b><br><b>(0.980, 1.000)</b>             |
| <b>CO</b>               | <b>-0.034</b><br><b>(-0.079, 0.012)<sup>b</sup></b>                                                                | <b>0.086</b><br><b>(0.012, 0.017)<sup>b</sup></b> | <b>1.018</b><br><b>(1.010, 1.025)<sup>b</sup></b> | <b>0.993</b><br><b>(0.983, 1.002)<sup>b</sup></b> |
| <b>O<sub>3</sub></b>    | -0.099<br>(-0.206, 0.009)                                                                                          | -0.110<br>(-0.253, 0.031)                         | <b>0.933</b><br><b>(0.911, 0.955)</b>             | <b>1.051</b><br><b>(1.033, 1.070)</b>             |

<sup>a</sup>Models adjusted for age, sex, COPD severity, IMD rank, ICS medication use, temperature and time.

<sup>b</sup>Per 0.01 ppm increase.

Table S7 - Associations between air pollutants and peak expiratory flow and exacerbation using personal exposures or ambient measurements as measured from the nearest monitor as exposure metrics. In bold are the statistically significant estimates.

|                   | PEF – Change per IQR increase (95% CI) <sup>a</sup> |                                          | Exacerbation – OR per IQR increase (95% CI) <sup>a</sup> |                                       |
|-------------------|-----------------------------------------------------|------------------------------------------|----------------------------------------------------------|---------------------------------------|
|                   | Ambient <sup>b</sup>                                | Personal <sup>c</sup>                    | Ambient <sup>b</sup>                                     | Personal <sup>c</sup>                 |
| PM <sub>2.5</sub> | <b>0.327</b><br><b>(0.001, 0.654)</b>               | 0.038<br>(-0.226, 0.302)                 | 1.017<br>(0.975, 1.061)                                  | 0.983<br>(0.953, 1.014)               |
| PM <sub>10</sub>  | 0.329<br>(-0.077, 0.734)                            | -0.038<br>(-0.309, 0.233)                | 1.032<br>(0.979, 1.088)                                  | 0.992<br>(0.957, 1.028)               |
| NO <sub>2</sub>   | <b>0.669</b><br><b>(0.156, 1.182)</b>               | 0.057<br>(-0.375, 0.490)                 | <b>1.159</b><br><b>(1.084, 1.240)</b>                    | <b>1.164</b><br><b>(1.086, 1.246)</b> |
| NO                | 0.074<br>(-0.014, 0.162)                            | <b>0.347</b><br><b>(0.055, 0.639)</b>    | 1.007<br>(0.996, 1.018)                                  | <b>1.094</b><br><b>(1.054, 1.136)</b> |
| CO                | 0.195<br>(-0.059, 0.449)                            | -0.058<br>(-0.397, 0.282)                | 1.027<br>(0.994, 1.061)                                  | <b>1.076</b><br><b>(1.030, 1.124)</b> |
| O <sub>3</sub>    | <b>-1.019</b><br><b>(-1.591, -0.447)</b>            | <b>-0.517</b><br><b>(-0.969, -0.066)</b> | 0.973<br>(0.900, 1.052)                                  | 1.017<br>(0.950, 1.089)               |

<sup>a</sup>Models adjusted for age, sex, COPD severity, IMD rank, ICS medication use, temperature and time.

<sup>b</sup>Ambient measurements IQRs: PM<sub>2.5</sub> = 8.0 µg/m<sup>3</sup>, PM<sub>10</sub> = 10.7 µg/m<sup>3</sup>, NO<sub>2</sub> = 10.9 ppb, NO = 5.6 ppb, CO = 0.08 ppm, O<sub>3</sub> = 15.0 ppb.

<sup>c</sup>Personal exposures IQRs: PM<sub>2.5</sub> = 10.8 µg/m<sup>3</sup>, PM<sub>10</sub> = 12.0 µg/m<sup>3</sup>, NO<sub>2</sub> = 5.2 ppb, NO = 7.2 ppb, CO = 0.08 ppm, O<sub>3</sub> = 5.0 ppb.
